# Supplementary material
Source: MDPI journal article supplement (https://www.mdpi.com/2073-4344/13/3/469)
Supplement: s1 [file s1]

# Supplementary Information

**Facile synthesis of a Bi<sub>2</sub>WO<sub>6</sub>/BiO<sub>2-x</sub> heterojunction efficient for  
photocatalytic degradation of ciprofloxacin under visible light**

**Hongzhong Zhang <sup>1,\*</sup>, Zhaoya Fan <sup>1</sup>, Qingqing Chai <sup>2</sup>, and Jun Li <sup>2,\*</sup>**

<sup>1</sup> *School of Materials and Chemical Engineering, Zhengzhou University of Light Industry,  
Zhengzhou 450001, P. R. China;*

<sup>2</sup> *Henan Institute of Advanced Technology, Zhengzhou University, Zhengzhou 450052, P.R.  
China.;*

<sup>\*</sup> Correspondence: zhz@zzuli.edu.cn; junli2019@zzu.edu.cn (J. Li)

**Table S1.** Crystallite size of the prepared materials.

| Samples                                                | Crystallite size (nm) |
|--------------------------------------------------------|-----------------------|
| BiO <sub>2-x</sub>                                     | 48.9                  |
| Bi <sub>2</sub> WO <sub>6</sub>                        | 6.4                   |
| 5%Bi <sub>2</sub> WO <sub>6</sub> /BiO <sub>2-x</sub>  | 40.4                  |
| 10%Bi <sub>2</sub> WO <sub>6</sub> /BiO <sub>2-x</sub> | 39.5                  |
| 15%Bi <sub>2</sub> WO <sub>6</sub> /BiO <sub>2-x</sub> | 38.9                  |
| 20%Bi <sub>2</sub> WO <sub>6</sub> /BiO <sub>2-x</sub> | 37.4                  |
| 25%Bi <sub>2</sub> WO <sub>6</sub> /BiO <sub>2-x</sub> | 36.5                  |

The average crystallite sizes for pure BiO<sub>2-x</sub> as well as Bi<sub>2</sub>WO<sub>6</sub>/BiO<sub>2-x</sub> composites are calculated using the Scherrer equation:

$$D = \frac{0.9\lambda}{\beta \cos\theta} \quad (1)$$

where D is the crystallite size,  $\lambda$  is the wavelength of the incident X-ray,  $\beta$  is the value of full width at half maxima (FWHM), and  $\theta$  is the diffraction angle corresponding to the most intense peak, i.e. (1 1 1) plane. The lattice parameters were calculated from the inter-planar distance (d) and the miller indices (h k l) of the most intense (1 1 1) plane using the equation[1]:

$$\frac{1}{d^2} = \frac{h^2}{a^2} + \frac{k^2}{b^2} + \frac{l^2}{c^2} \quad (2)$$

These results indicated that the proposed heterostructure induced lattice strain in Bi<sub>2</sub>WO<sub>6</sub>/BiO<sub>2-x</sub> did not reflect any significant changes in the lattice parameters a, b, and c.

**Table S2.** Porous parameters of BiO<sub>2-x</sub>, Bi<sub>2</sub>WO<sub>6</sub> and 20% Bi<sub>2</sub>WO<sub>6</sub>/BiO<sub>2-x</sub>.

| Samples                                                | Surface<br>(m <sup>2</sup> /g) | Area | Pore Volume<br>(cm <sup>3</sup> /g) | Pore Size<br>(nm) |
|--------------------------------------------------------|--------------------------------|------|-------------------------------------|-------------------|
| BiO <sub>2-x</sub>                                     | 5.1639                         |      | 0.032946                            | 53.7777           |
| Bi <sub>2</sub> WO <sub>6</sub>                        | 101.5031                       |      | 0.255709                            | 8.7168            |
| 20%Bi <sub>2</sub> WO <sub>6</sub> /BiO <sub>2-x</sub> | 10.4902                        |      | 0.043427                            | 32.0445           |

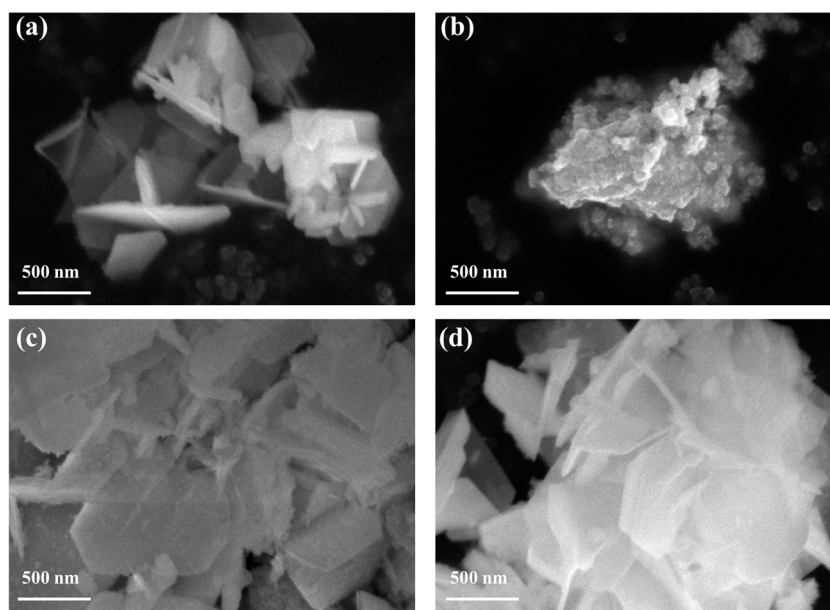

**Figure S1.** SEM image of (a) BiO<sub>2-x</sub>; (b) Bi<sub>2</sub>WO<sub>6</sub>; 20% Bi<sub>2</sub>WO<sub>6</sub>/BiO<sub>2-x</sub>(c) before and(d) after use

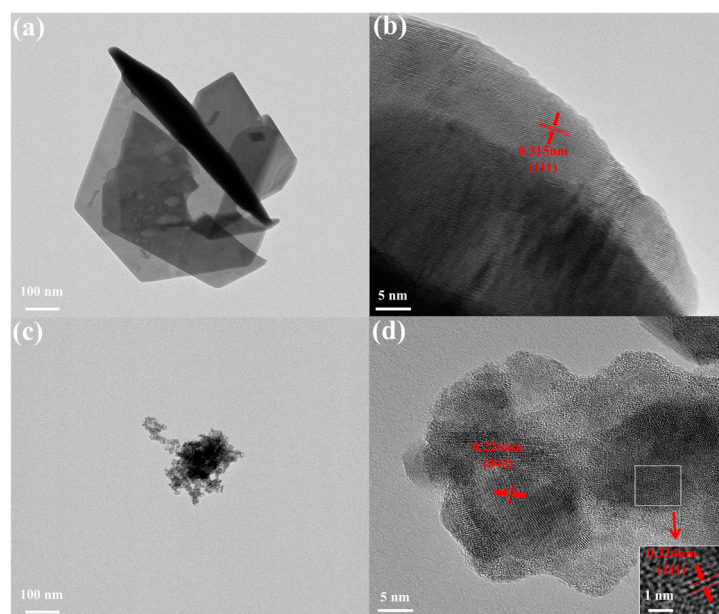

**Figure S2.** TEM images of (a)  $\text{BiO}_{2-x}$ ; (c)  $\text{Bi}_2\text{WO}_6$  and HRTEM images of (b)  $\text{BiO}_{2-x}$ ; (d)  $\text{Bi}_2\text{WO}_6$ .

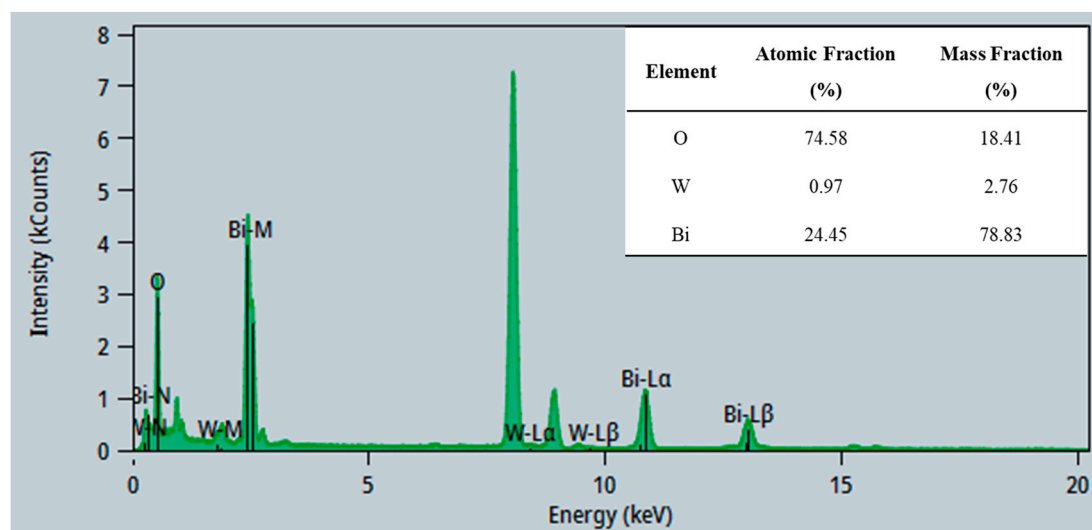

Figure S3. EDX spectrum of 20% Bi<sub>2</sub>WO<sub>6</sub>/BiO<sub>2-x</sub>.

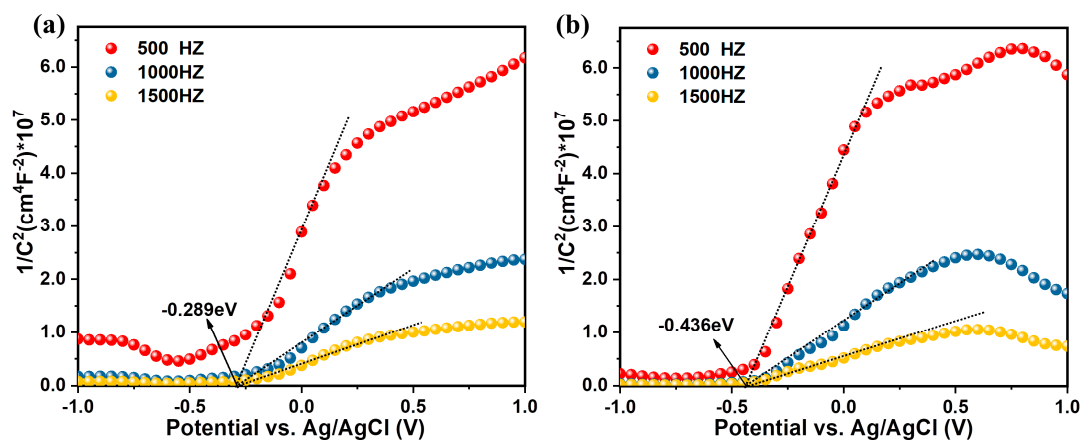

**Figure S4.** The Mott-Schottky plots of (a)  $\text{Bi}_2\text{WO}_6$  and (b)  $\text{BiO}_{2-x}$  at different frequencies (500 Hz, 1000 Hz and 1500 Hz).

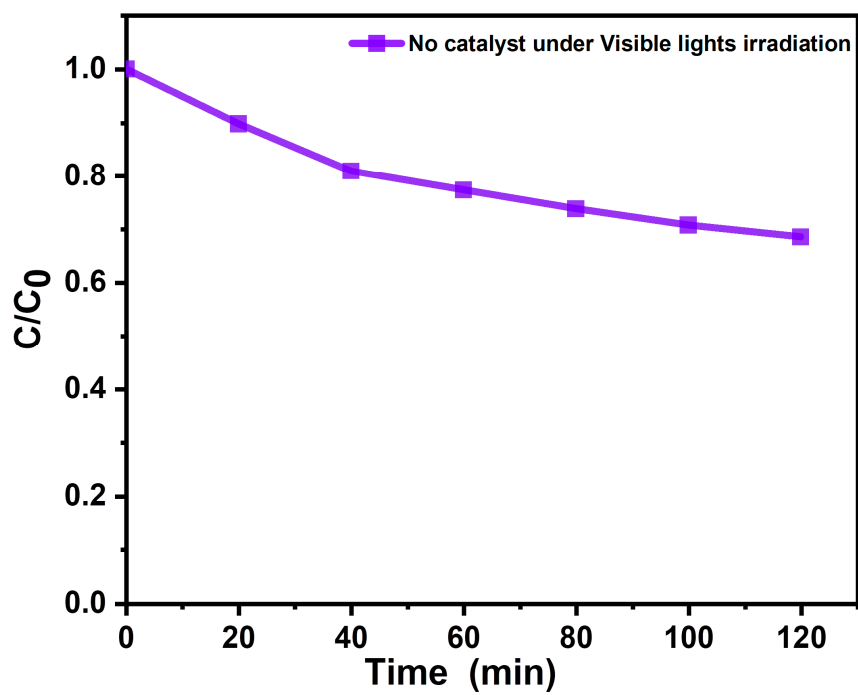

**Figure S5.** Photocatalytic degradation of CIP without any catalyst for comparison tests. (condition: sample dosage = 0.5 g/L, CIP concentration: 10 mg/L).



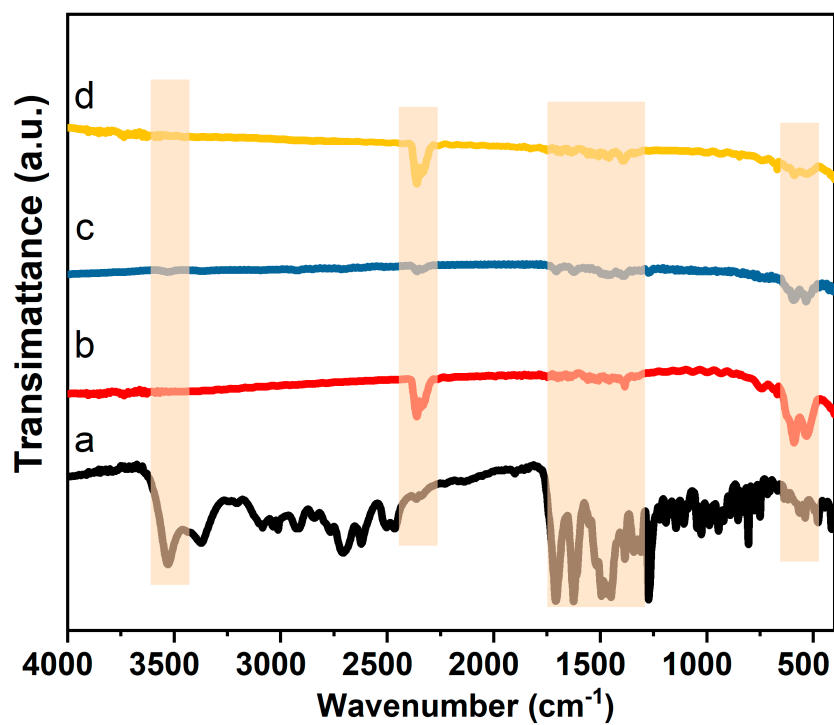

**Figure S6.** FT-IR spectra of (a)CIP ,(b)20% Bi<sub>2</sub>WO<sub>6</sub>/BiO<sub>2-x</sub> (c) 20% Bi<sub>2</sub>WO<sub>6</sub>/BiO<sub>2-x</sub> after mixing with CIP in the dark for 30 min, and (d) 20% Bi<sub>2</sub>WO<sub>6</sub>/BiO<sub>2-x</sub> after mixing with CIP in the dark for 30 min and then under visible light irradiation for 2h.

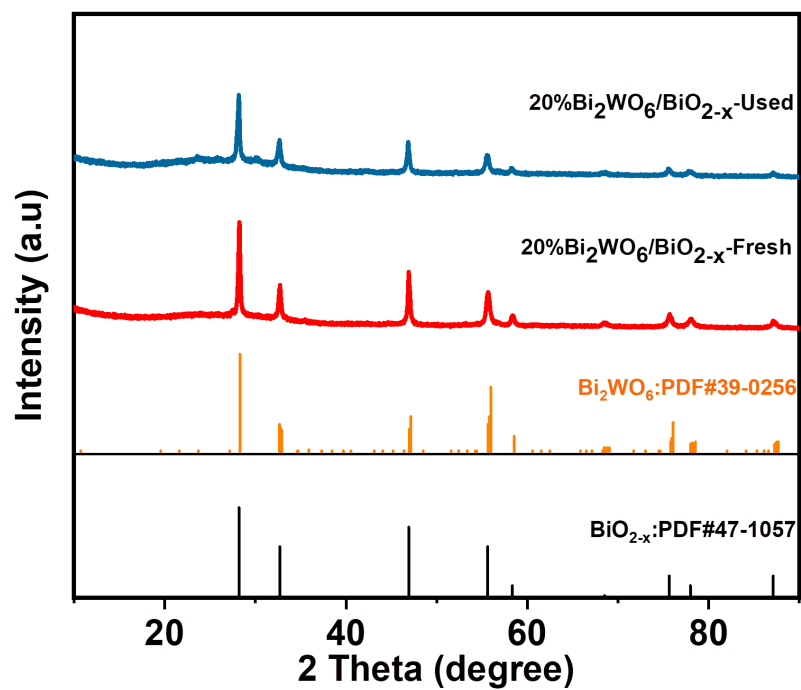

**Figure S7.** XRD patterns of BiO<sub>2-x</sub>, Bi<sub>2</sub>WO<sub>6</sub>, fresh and used Bi<sub>2</sub>WO<sub>6</sub>/BiO<sub>2-x</sub> composites.

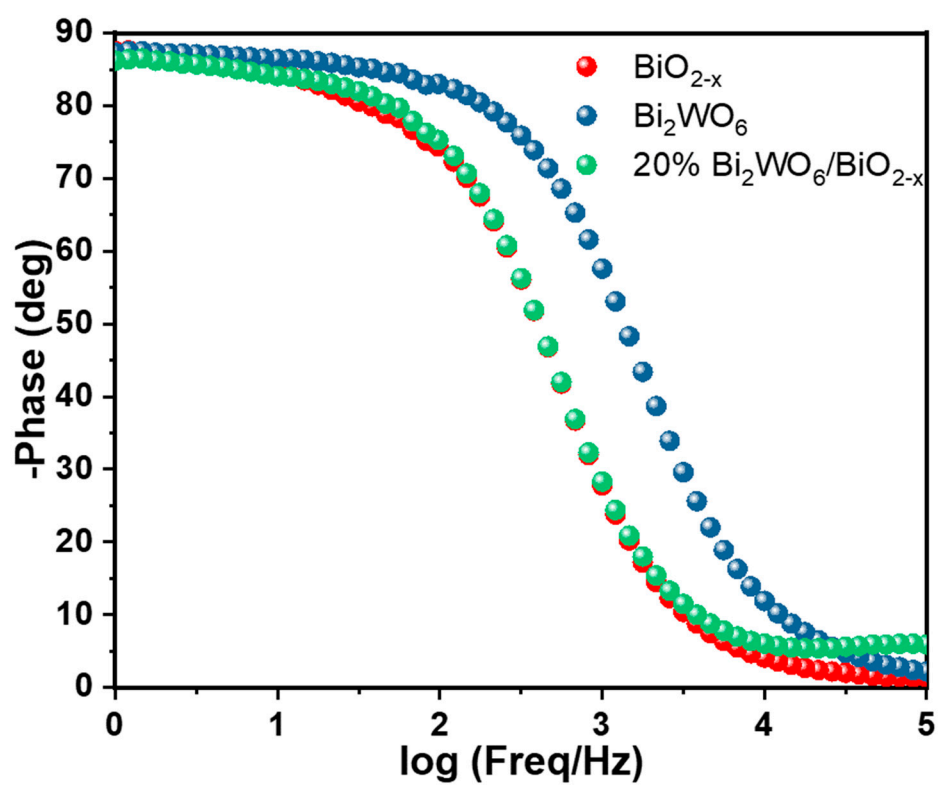

Figure S8. Bode plots of  $\text{BiO}_{2-x}$ ,  $\text{Bi}_2\text{WO}_6$  and 20%  $\text{Bi}_2\text{WO}_6/\text{BiO}_{2-x}$ .

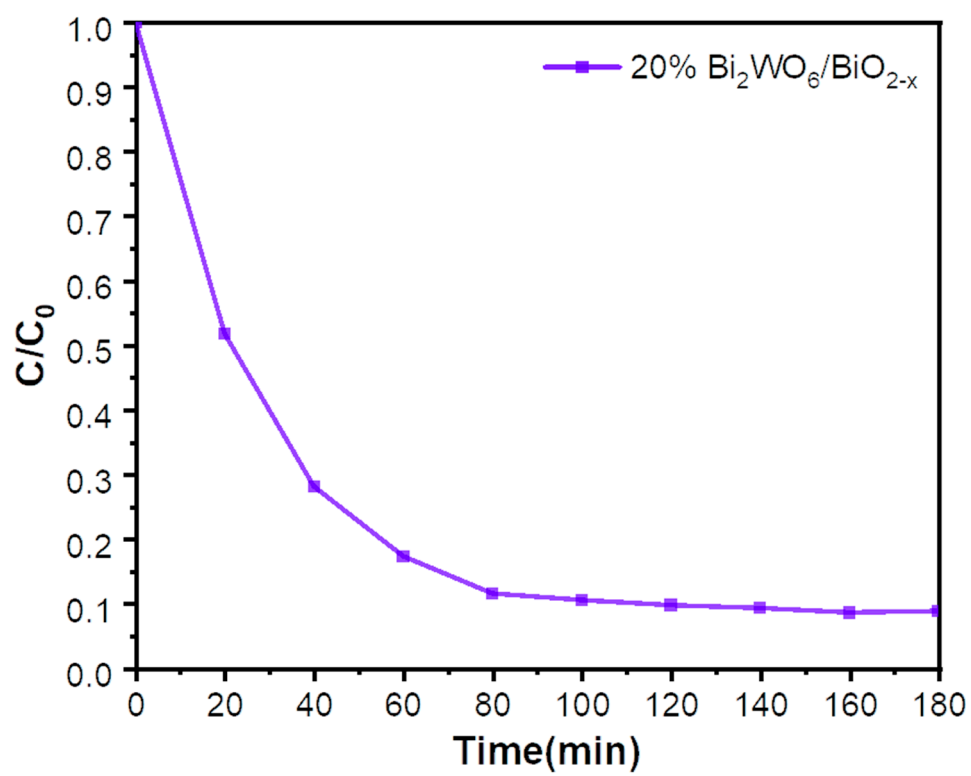

**Figure S9.** Photocatalytic degradation of CIP with prolonged light time for comparison test. (condition: sample dosage = 0.5 g/L, CIP concentration: 10 mg/L)

**Table S3.** The catalytic performance comparison of recently reported catalysts for CIP degradation based on reduction percentages and reaction time.

| Catalyst                                                         | Catalyst dosage<br>(g/L) | Pollutant concentration<br>(mg/L) | Time (min) | Reduction percentage<br>(%) | Ref.      |
|------------------------------------------------------------------|--------------------------|-----------------------------------|------------|-----------------------------|-----------|
| Vo-WO <sub>3</sub> /Bi <sub>2</sub> WO <sub>6</sub>              | 0.4                      | 10                                | 120        | 79.5                        | [2]       |
| 0.9-BiOI <sub>3</sub> /Bi <sub>2</sub> O <sub>4</sub>            | 0.6                      | 20                                | 60         | 85.6                        | [3]       |
| R <sub>2</sub> -Cu <sub>2</sub> O                                | 0.6                      | 20                                | 240        | 94.6                        | [4]       |
| 20%In <sub>2</sub> O <sub>3</sub> /BiOCl                         | 1                        | 20                                | 35         | 91                          | [5]       |
| BS/BOC                                                           | 0.4                      | 20                                | 120        | 61                          | [6]       |
| BWO/ BOB/R <sub>5</sub>                                          | 0.25                     | 10                                | 120        | 90.7                        | [7]       |
| N-TiO <sub>2</sub>                                               | 0.5                      | 10                                | 180        | 55                          | [8]       |
| g-C <sub>3</sub> N <sub>4</sub> /Bi <sub>2</sub> WO <sub>6</sub> | 1                        | 15                                | 120        | 97.87                       | [9]       |
| BOB-Cu                                                           | 0.5                      | 10                                | 120        | 88                          | [10]      |
| BiOBr-7                                                          | 0.5                      | 10                                | 180        | 94                          | [11]      |
| 20% Bi <sub>2</sub> WO <sub>6</sub> /BiO <sub>2-x</sub>          | 0.5                      | 10                                | 120        | 91.8                        | This work |

## Reference

1. Kumar, G.; Dutta, R. K. Fabrication of plate-on-plate  $\text{SnS}_2/\text{Bi}_2\text{WO}_6$  nanocomposite as photocatalyst for sunlight mediated degradation of antibiotics in aqueous medium. *J. Phys. Chem. Solids*. **2022**, *164*, 110639.
2. Zhang, M.; Lai, C.; Li, B.; Huang, D.; Liu, S.; Qin, L.; Yi, H.; Fu, Y.; Xu, F.; Li, M.; Li, L. Ultrathin oxygen-vacancy abundant  $\text{WO}_3$  decorated monolayer  $\text{Bi}_2\text{WO}_6$  nanosheet: A 2D/2D heterojunction for the degradation of Ciprofloxacin under visible and NIR light irradiation. *J. Colloid Interface Sci.* **2019**, *556*, 557-567.
3. Hu, H.; Xu, C.; Jin, J.; Xu, M.; Cheng, Y.; Ji, W.; Ding, Z.; Shao, M.; Wan, Y. Synthesis of a  $\text{BiOI/O}_3/\text{Bi}_2\text{O}_4$  heterojunction that can efficiently degrade rhodamine B and ciprofloxacin under visible light. *Opt. Mater.* **2022**, *133*, 112893.
4. Yu, X.; Zhang, J.; Zhang, J.; Niu, J.; Zhao, J.; Wei, Y.; Yao, B. Photocatalytic degradation of ciprofloxacin using Zn-doped  $\text{Cu}_2\text{O}$  particles: Analysis of degradation pathways and intermediates. *Chem. Eng. J.* **2019**, *374*, 316-327.
5. Xu, K.; Shen, J.; Zhang, S.; Xu, D.; Chen, X. Efficient interfacial charge transfer of  $\text{BiOCl-In}_2\text{O}_3$  step-scheme heterojunction for boosted photocatalytic degradation of ciprofloxacin. *J. Mater. Sci. Technol.* **2022**, *121*, 236-244.
6. Bai, L.; Cao, Y.; Pan, X.; Shu, Y.; Dong, G.; Zhao, M.; Zhang, Z.; Wu, Y.; Wang, B. Z-scheme  $\text{Bi}_2\text{S}_3/\text{Bi}_2\text{O}_2\text{CO}_3$  nanoheterojunction for the degradation of antibiotics and organic compounds in wastewater: Fabrication, application, and mechanism. *Surf. Interfaces*. **2023**, *36*, 102612.
7. Wang, J.; Chang, X.; Zhao, Y.; Xu, H.; He, G.; Chen, H. A novel  $\text{Bi}_2\text{WO}_6/\text{BiOBr}/\text{RGO}$  photocatalyst for enhanced degradation of ciprofloxacin under visible light irradiation: Performance, mechanism and toxicity evaluation. *Diamond Relat. Mater.* **2022**, *128*, 109274.
8. Karim, A. V.; Shrivastav, A. Degradation of ciprofloxacin using photo, sono, and sonophotocatalytic oxidation with visible light and low-frequency ultrasound: Degradation kinetics and pathways. *Chem. Eng. J.* **2020**, *392*, 124853.
9. Mao, J.; Hong, B.; Wei, J.; Xu, J.; Han, Y.; Jin, H.; Jin, D.; Peng, X.; Li, J.; Yang, Y.; Gong, J.; Ge, H.; Wang, X. Enhanced Ciprofloxacin Photodegradation of Visible - Light - Driven Z - Scheme  $\text{g-C}_3\text{N}_4/\text{Bi}_2\text{WO}_6$  Nanocomposites and Interface Effect. *ChemistrySelect* **2019**, *4* (46), 13716-13723.
10. Wen, R.; Yang, L.; Wu, S.; Zhou, D.; Jiang, B. Tuning surface sites to boost photocatalytic degradation of phenol and ciprofloxacin. *Chin. Chem. Lett.* **2023**, *34* (1), 107204.
11. Chen, X.; Gao, X.; Ai, L.; Fan, H. Triton X-100-assisted synthesis of layered nanosheet-assembled flower-like  $\text{BiOBr}$  nanostructures with enhanced visible-light photocatalytic degradation of ciprofloxacin. *J. Nanopart. Res.* **2022**, *24* (6), 103.
